# Supplementary material for: Knockdown of a nutrient amino acid transporter gene LdNAT1 reduces free neutral amino acid contents and impairs Leptinotarsa decemlineata pupation
Source: PubMed Central journal article supplement (PMC4676043; doi:10.1038/srep18124), 2015-12-11
Supplement: srep18124-s1.pdf [file srep18124-s1.pdf]

**Knockdown of a nutrient amino acid transporter gene *LdNAT1*  
reduces free neutral amino acid contents and impairs *Leptinotarsa*  
*decemlineata* pupation**

Kai-Yun Fu<sup>1</sup>, Wen-Chao Guo<sup>2</sup>, Tursun Ahmat<sup>2</sup>, Guo-Qing Li<sup>1</sup> \*

1. Education Ministry Key Laboratory of Integrated Management of Crop Diseases and Pests, College of Plant Protection, Nanjing Agricultural University, Nanjing 210095, China
2. Department of Plant Protection, Xinjiang Academy of Agricultural Sciences; Urumqi 830091, China

**Table S1. Primers used for RT-PCR, 5' or 3'RACE, dsRNA synthesis and qRT-PCR**

| Fragment name           | Forward primer(5'-3')     | Reverse primer(5'-3')        |
|-------------------------|---------------------------|------------------------------|
| <b>RT-PCR</b>           |                           |                              |
| LdNAT1                  | CTTCCTGGACCGAGTGT         | AATGTGATCCGCATACCT           |
| Ld4EBP                  | GTAAGGGTTACAGTGTCAAG      | AAACGGCAGTTAGAAGTAGA         |
| LdINR                   | CGTTTTCAATACCAACTTCAGC    | CGACTCCTGCGGGACTATG          |
| LdTOR                   | AACAATGTTACGAGGAGTCTGG    | TCGTGAGTTGTATTTGCCTGT        |
| LdFOXO                  | AACAATGTTACGAGGAGTCTGG    | TCGTGAGTTGTATTTGCCTGT        |
| LdE75A                  | ATAAAGTTGAGCCGATGTTG      | ATCTGGAGTTGGGATTGC           |
| LdE75B                  | TACCCCTATGGAGGAAGAG       | GTGATACAAACAGGCGAGA          |
| LdE75C                  | AAAAGTGGAGCCCAACGAG       | CAACGGCCTTATCCAAAG           |
| <b>RACE</b>             |                           |                              |
| LdNAT1 5'-G             |                           | CCTTTCACGGCATTGTCATTCTCA     |
| Ld4EBP 5'-G             |                           | TGGCAAGATGCTCAGGGATGTG       |
| LdINR 5'-G              |                           | CAATCTGCTGAGCCTTGTGTAGTGG    |
| LdNAT1 3'-G             | TGGAGAATGTCGTGGGGACTCAT   |                              |
| Ld4EBP 3'-G             | CACATCCCTGAGCATCTTGCCATT  |                              |
| LdINR 3'-G              | AGAGCATCACGATCCACCTCTTCAG |                              |
| LdE75A 5'-G             |                           | CGGTATTTCTGAGGCCGGGACGAT     |
| LdE75A 5'-N             |                           | TCGACTACACCACGTATAGCTGGGGAAA |
| <b>ORF verification</b> |                           |                              |
| LdNAT1                  | GGAAAATCAGGCGTAAAA        | AGTAATTGAAAACGACGC           |
| Ld4EBP                  | CATGCCTGAATCTCCTAA        | AACAGATCAAGTCATCCC           |

---

|                        |                          |                           |
|------------------------|--------------------------|---------------------------|
| LdINR                  | TTGCCTGGCTTATTTACC       | TTATCGAGCTGTTTGCTT        |
| LdE75A                 | GCAGTTTGGTTCGTGATAC      | AGAGTGCTAGGGATTGGT        |
| LdE75B                 | TTGTAGATAGGTTGAGGGAG     | AGAGTGCTAGGGATTGGT        |
| LdE75C                 | GTGCGTGATTGGCCTAGG       | TTCTGGTCATGGCGGAAG        |
| <b>dsRNA synthesis</b> |                          |                           |
| dsLdNAT1-1             | TTTCATACCCAGAAGCTA       | CCATGCTGTGTTTTCTGTCA      |
| dsLdNAT1-2             | GGACTCGGAATACCAGAT       | GGAAACTATTATCGCATCA       |
| dsSHD                  | TTGGTGTTCTCTCTACCTTG     | TGGCCTTGTAAGTTCTACGTCTAT  |
| dsE75                  | TCCCAAGAGAGAAAAAGCG      | GGCAAGCAAGGAGAATCC        |
| dsFTZ-F1               | TCTGCTGAGTTTGGGGTT       | GTGCTTGTGGTAGAGGTGTT      |
| dsAS-C                 | GGCATCTGGGAGAAAATAG      | GAAGTAGCAGGCTCTGAATCT     |
| dsJHAMT                | GGACAAGCCCGACTTATACTC    | GCGAACTCCACCTCATCAA       |
| dsefp                  | AAGTTCAGCGTGTCCG         | CTTGCCGTAGTTCAC           |
| <b>qRT-PCR</b>         |                          |                           |
| qLdNAT1                | CCGGCACAGGCTTAGCATTCAATT | AGAGCTATCAGGCTTCCAACTCCT  |
| qLdInR                 | TCTCAAGCGAATCAGAGGTG     | GTTACGCCAATCCCAAAGTT      |
| qLd4EBP                | TGCAGGGAGATCTCAACAAA     | CAGAGAAGATCAACAAGCAGGA    |
| qLdTOR                 | GGCTGAAATATGCTGCGTTA     | AGGAGAAACCATTGGCAAAC      |
| qLdFOXO                | CGCGTAAACTACTGCGTCAT     | GCACTGAACCACAGATCCAC      |
| qLdAS-C                | ATGCAAGGCTTTCTCCATCT     | TTGATTGTTGTCCGGGTCTA      |
| qLdJHAMT               | GGAAGTGGAGATGGCAAGTT     | CTACCAACGAGTTTCCCGAT      |
| qLdKr-h1               | ATCAAGTGCCATTCCGAAAGCAA  | ATGTCGGAATCATAGCTGACGGGT  |
| qLdSHD                 | GGCCTGAACTGGTTTTGCAT     | GGCAAGAATAACCGAGGAAGAG    |
| qLdE75                 | CAAGACCAGTGGGAAATCAG     | ATTGTGCGCCATCCTGAGATT     |
| qLdFTZ-f1              | CAAATGAAGCTTCTCCAGCA     | TATGAAGGGTGGTTTCGTCA      |
| qLdRP4                 | AAAGAAACGAGCATTGCCCTCCG  | TTGTGCGCTGACACTGTAGGGTTGA |
| qLdRP18                | TAGAATCCTCAAAGCAGGTGGCGA | AGCTGGACCAAAGTGTTTCACTGC  |
| qLdARF1                | CGGTGCTGGTAAAACGACAA     | TGACCTCCCAAATCCCAAAC      |
| qLdARF4                | GTGCTCGTGAACCATGTGAA     | AACCTCCAATCCCTCGTGAA      |

---

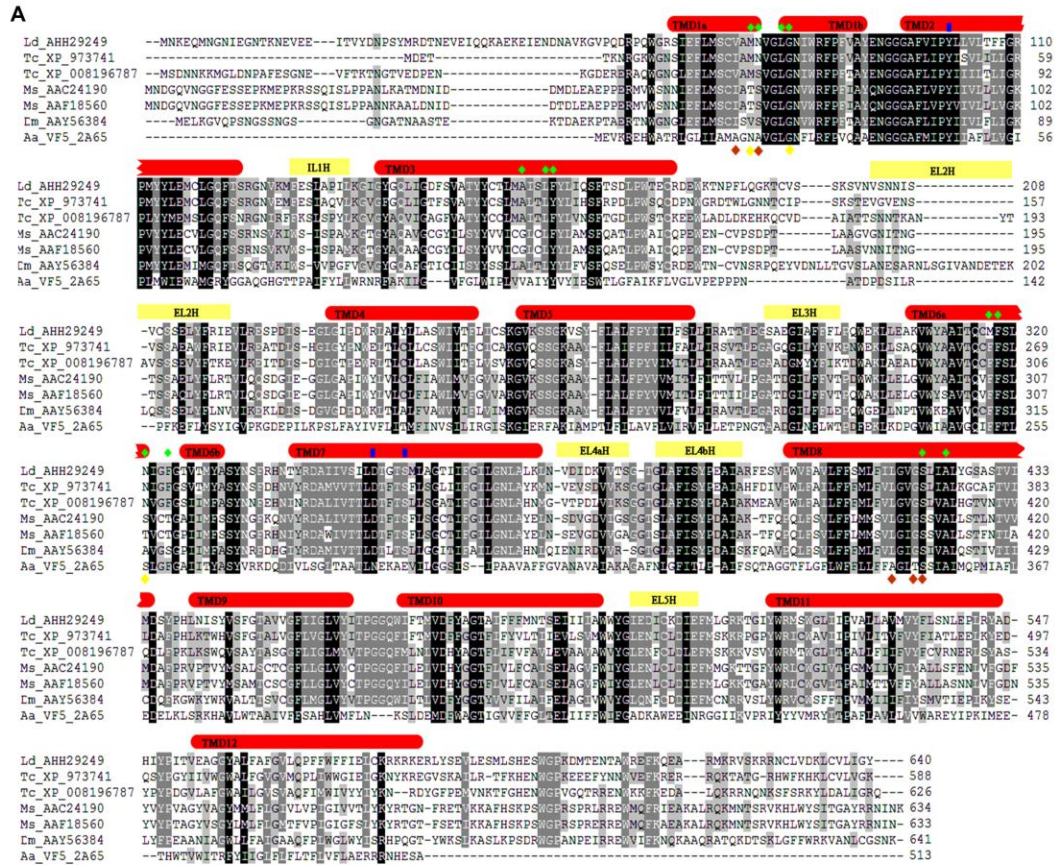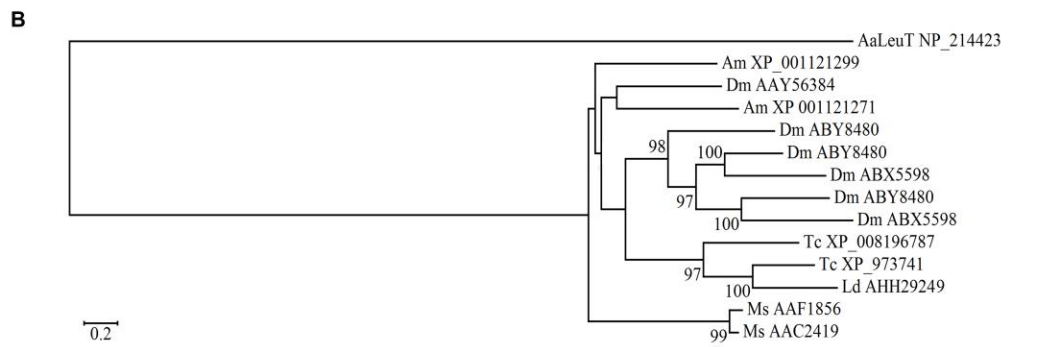

**Figure S1. Multiple alignment (A) and phylogenetic analysis (B) of a putative NAT1 from *Leptinotarsa decemlineata*.** The amino acid sequence of *Ld*NAT1 (*Ld\_AHH29249*) is aligned with those from *Tribolium castaneum* (*Tc*, XP\_973741; XP\_008196787), *Manduca sexta* (*Ms*, AAC24190; AAF18560), *Drosophila melanogaster* (*Dm*, AAY56384), and *Aedes aegypti* (*Aa*, VE5\_2A65). Increasing background intensity indicates an increase in sequence similarity. Red color bars above the sequences are transmembrane domains (TMDs). Green diamonds indicate substrate-binding sites, red and brown rhombuses are the first and second sodium ion-binding sites, respectively, in other SLC6 members. For phylogenetic analysis, NAT-like representatives originate from 6 insect species. Bootstrap values (1000 replicates) are displayed by the nodes. The genetic distance is drawn to scale.

**Table S2. Content of hydrolytic amino acids in the potato foliage ( $\mu\text{mol/g}$ )**

| <b>Amino acid</b>   | <b>Content</b>     |
|---------------------|--------------------|
| Alanine (Ala)       | 45.57 $\pm$ 4.16   |
| Arginine (Arg)      | 25.63 $\pm$ 2.05   |
| Aspartic acid (Asp) | 6.44 $\pm$ 3.86    |
| Asparagine (Asn)    | 51.34 $\pm$ 4.54   |
| Cysteine (Cys)      | 1.31 $\pm$ 0.08    |
| Glutamate (Glu)     | 5.03 $\pm$ 0.31    |
| Glutamine (Gln)     | 50.97 $\pm$ 3.98   |
| Glycine (Gly)       | 50.39 $\pm$ 4.25   |
| Histidine (His)     | 10.08 $\pm$ 0.54   |
| Isoleucine (Ile)    | 24.69 $\pm$ 1.31   |
| Leucine (Leu)       | 46.45 $\pm$ 3.84   |
| Lysine (Lys)        | 34.01 $\pm$ 2.57   |
| Methionine (Met)    | 7.07 $\pm$ 0.71    |
| Phenylalanine (Phe) | 22.11 $\pm$ 1.74   |
| Proline (Pro)       | 33.64 $\pm$ 2.41   |
| Serine (Ser)        | 29.29 $\pm$ 2.17   |
| Threonine (Thr)     | 27.86 $\pm$ 1.34   |
| Tyrosine (Tyr)      | 16.11 $\pm$ 1.02   |
| Valine (Val)        | 35.59 $\pm$ 2.51   |
| Total               | 523.58 $\pm$ 45.33 |

Hydrolytic amino acids in the foliage were extracted by acid hydrolysis method, and analyzed with a Beckman 6300 Amino Acid Analyzer.

**Table S3. Contents of free amino acids in the body and feces of *Leptinotarsa decemlineata* third-instar larvae fed on PBS, *dsejfp*, *dsNAT1-1* and *dsNAT1-2*-immersed foliage for 3 days**

| Amino acid          | Origin | Concentration ( $\mu\text{mol/g}$ ) |                      |                      |                      |
|---------------------|--------|-------------------------------------|----------------------|----------------------|----------------------|
|                     |        | PBS                                 | <i>dsejfp</i>        | <i>dsNAT1-1</i>      | <i>dsNAT1-2</i>      |
| Alanine (Ala)       | Body   | 59.19 $\pm$ 4.16 a                  | 73.79 $\pm$ 5.69 a   | 63.73 $\pm$ 4.32 a   | 65.08 $\pm$ 3.83 a   |
|                     | Feces  | 25.32 $\pm$ 2.71 a                  | 41.18 $\pm$ 3.44 a   | 40.91 $\pm$ 3.58 a   | 61.17 $\pm$ 6.79 a   |
| Arginine (Arg)      | Body   | 35.07 $\pm$ 1.69 a                  | 35.09 $\pm$ 3.45 a   | 32.89 $\pm$ 3.07 a   | 35.79 $\pm$ 2.67 a   |
|                     | Feces  | 13.11 $\pm$ 0.81 a                  | 17.32 $\pm$ 1.13 a   | 24.95 $\pm$ 1.27 a   | 23.35 $\pm$ 1.06 a   |
| Aspartic acid (Asp) | Body   | 7.18 $\pm$ 0.49 a                   | 8.73 $\pm$ 0.54 a    | 7.75 $\pm$ 0.43 a    | 7.93 $\pm$ 0.50 a    |
|                     | Feces  | 2.81 $\pm$ 0.18 a                   | 4.74 $\pm$ 0.35 a    | 3.97 $\pm$ 0.36 a    | 4.56 $\pm$ 0.29 a    |
| Asparagine (Asn)    | Body   | 64.23 $\pm$ 4.67 a                  | 80.11 $\pm$ 5.81 a   | 70.24 $\pm$ 4.48 a   | 72.81 $\pm$ 5.07 a   |
|                     | Feces  | 42.38 $\pm$ 2.25 a                  | 25.47 $\pm$ 2.04 b   | 36.49 $\pm$ 3.16 ab  | 48.37 $\pm$ 3.57 a   |
| Cysteine (Cys)      | Body   | 6.89 $\pm$ 0.51 aA                  | 10.50 $\pm$ 0.67 aA  | 2.10 $\pm$ 0.16 bB   | 0.25 $\pm$ 0.02 cB   |
|                     | Feces  | 0.25 $\pm$ 0.02 B                   | 0.25 $\pm$ 0.02 B    | 4.58 $\pm$ 0.37 A    | 7.70 $\pm$ 0.51 A    |
| Glutamate (Glu)     | Body   | 10.43 $\pm$ 0.81 a                  | 11.95 $\pm$ 1.03 a   | 11.74 $\pm$ 0.71 a   | 11.79 $\pm$ 0.54 a   |
|                     | Feces  | 3.15 $\pm$ 0.34 a                   | 5.98 $\pm$ 0.41 a    | 3.77 $\pm$ 0.24 a    | 5.41 $\pm$ 0.40 a    |
| Glutamine (Gln)     | Body   | 90.67 $\pm$ 5.09 a                  | 108.64 $\pm$ 8.34 a  | 100.24 $\pm$ 7.67 a  | 102.47 $\pm$ 8.34 a  |
|                     | Feces  | 50.17 $\pm$ 3.77 a                  | 30.47 $\pm$ 2.23 a   | 50.19 $\pm$ 4.12 a   | 34.62 $\pm$ 1.38 a   |
| Glycine (Gly)       | Body   | 71.31 $\pm$ 6.29 a                  | 86.59 $\pm$ 4.98 a   | 80.10 $\pm$ 5.08 a   | 82.39 $\pm$ 4.96 a   |
|                     | Feces  | 96.44 $\pm$ 8.11 a                  | 109.74 $\pm$ 5.08 a  | 110.32 $\pm$ 9.16 a  | 90.72 $\pm$ 5.13 a   |
| Histidine (His)     | Body   | 21.32 $\pm$ 0.71 a                  | 19.86 $\pm$ 0.54 a   | 9.44 $\pm$ 0.35 b    | 10.50 $\pm$ 0.49 b   |
|                     | Feces  | 4.69 $\pm$ 0.57 b                   | 4.66 $\pm$ 0.41 b    | 8.64 $\pm$ 0.37 a    | 12.06 $\pm$ 0.61 a   |
| Isoleucine (Ile)    | Body   | 39.21 $\pm$ 1.13 a                  | 45.54 $\pm$ 2.02 a   | 21.79 $\pm$ 1.51 b   | 20.38 $\pm$ 1.44 b   |
|                     | Feces  | 15.40 $\pm$ 0.87 b                  | 13.72 $\pm$ 0.74 b   | 30.73 $\pm$ 1.57 a   | 27.28 $\pm$ 1.63 a   |
| Leucine (Leu)       | Body   | 65.00 $\pm$ 3.54 a                  | 63.12 $\pm$ 4.13 a   | 38.40 $\pm$ 2.33 b   | 37.77 $\pm$ 1.79 b   |
|                     | Feces  | 23.30 $\pm$ 1.47 b                  | 26.91 $\pm$ 1.56 b   | 46.79 $\pm$ 3.64 a   | 48.52 $\pm$ 4.11 a   |
| Lysine (Lys)        | Body   | 58.53 $\pm$ 4.17 a                  | 63.41 $\pm$ 7.79 a   | 53.75 $\pm$ 4.81 a   | 56.47 $\pm$ 6.81 a   |
|                     | Feces  | 11.51 $\pm$ 1.12 a                  | 15.76 $\pm$ 1.06 a   | 15.27 $\pm$ 1.14 a   | 11.12 $\pm$ 1.03 a   |
| Methionine (Met)    | Body   | 1.60 $\pm$ 0.11 a                   | 1.54 $\pm$ 0.08 a    | 0.65 $\pm$ 0.02 b    | 0.41 $\pm$ 0.01 b    |
|                     | Feces  | 0.15 $\pm$ 0.01 b                   | 0.40 $\pm$ 0.02 b    | 2.64 $\pm$ 0.15 a    | 1.51 $\pm$ 0.11 a    |
| Phenylalanine (Phe) | Body   | 26.25 $\pm$ 1.47 a                  | 29.72 $\pm$ 1.55 a   | 11.51 $\pm$ 0.71 b   | 14.34 $\pm$ 0.57 b   |
|                     | Feces  | 11.55 $\pm$ 0.57 b                  | 12.97 $\pm$ 0.69 b   | 22.34 $\pm$ 1.21 a   | 24.58 $\pm$ 1.54 a   |
| Proline (Pro)       | Body   | 43.85 $\pm$ 4.17 a                  | 59.87 $\pm$ 5.44 a   | 66.94 $\pm$ 6.13 a   | 57.02 $\pm$ 5.84 a   |
|                     | Feces  | 21.83 $\pm$ 2.23 b                  | 31.22 $\pm$ 2.47 ab  | 41.94 $\pm$ 3.49 a   | 44.33 $\pm$ 3.12 a   |
| Serine (Ser)        | Body   | 52.88 $\pm$ 3.74 a                  | 59.52 $\pm$ 3.69 a   | 26.64 $\pm$ 1.27 b   | 28.63 $\pm$ 1.34 b   |
|                     | Feces  | 16.27 $\pm$ 0.79 b                  | 15.34 $\pm$ 0.85 b   | 31.11 $\pm$ 1.45 a   | 42.19 $\pm$ 1.85 a   |
| Threonine (Thr)     | Body   | 35.95 $\pm$ 2.57 a                  | 41.81 $\pm$ 3.39 a   | 41.38 $\pm$ 4.01 a   | 43.73 $\pm$ 3.85 a   |
|                     | Feces  | 24.54 $\pm$ 1.84 a                  | 20.42 $\pm$ 1.15 a   | 24.88 $\pm$ 1.59 a   | 23.70 $\pm$ 1.82 a   |
| Tyrosine (Tyr)      | Body   | 25.19 $\pm$ 1.48 a                  | 25.60 $\pm$ 1.81 a   | 25.93 $\pm$ 1.94 a   | 25.21 $\pm$ 1.76 a   |
|                     | Feces  | 7.71 $\pm$ 0.71 b                   | 10.66 $\pm$ 0.83 ab  | 14.21 $\pm$ 0.91 a   | 19.08 $\pm$ 1.23 a   |
| Valine (Val)        | Body   | 63.18 $\pm$ 6.02 a                  | 73.97 $\pm$ 6.79 a   | 76.07 $\pm$ 7.05 a   | 66.18 $\pm$ 6.67 a   |
|                     | Feces  | 21.40 $\pm$ 1.84 b                  | 32.70 $\pm$ 2.33 ab  | 30.69 $\pm$ 3.14 ab  | 43.05 $\pm$ 4.17 a   |
| Total               | Body   | 777.93 $\pm$ 52.58 a                | 899.36 $\pm$ 63.44 a | 711.29 $\pm$ 56.81 a | 719.15 $\pm$ 61.53 a |
|                     | Feces  | 391.98 $\pm$ 29.48 a                | 419.91 $\pm$ 31.21 a | 554.42 $\pm$ 27.68 a | 593.32 $\pm$ 29.24 a |

Free amino acid contents are analyzed with a Beckman 6300 Amino Acid Analyzer. Difference of the content of each amino acid among treatments is analyzed by ANOVA followed by the Tukey-Kramer test. Data that do not share the same lowercase or uppercase letter are significantly different at P values of 0.05 or 0.01.

**Table S4. Contents of free amino acids in the body and feces of *Leptinotarsa decemlineata* fourth-instar larvae fed on PBS, *dsegfp*, *dsNAT1-1* and *dsNAT1-2*-immersed foliage for 3 days**

| Amino acid          | Origin | Concentration ( $\mu\text{mol/g}$ ) |                      |                      |                      |
|---------------------|--------|-------------------------------------|----------------------|----------------------|----------------------|
|                     |        | PBS                                 | <i>dsegfp</i>        | <i>dsNAT1-1</i>      | <i>dsNAT1-2</i>      |
| Alanine (Ala)       | Body   | 63.16 $\pm$ 4.33 a                  | 64.05 $\pm$ 5.14 a   | 58.01 $\pm$ 3.03 a   | 60.39 $\pm$ 3.81 a   |
|                     | Feces  | 25.32 $\pm$ 1.57 a                  | 23.65 $\pm$ 2.51 a   | 28.09 $\pm$ 1.64 a   | 39.34 $\pm$ 2.09 a   |
| Arginine (Arg)      | Body   | 36.06 $\pm$ 2.17 a                  | 34.68 $\pm$ 2.05 a   | 30.51 $\pm$ 1.83 a   | 31.43 $\pm$ 1.14 a   |
|                     | Feces  | 13.11 $\pm$ 0.52 a                  | 11.75 $\pm$ 1.42 a   | 14.63 $\pm$ 0.97 a   | 13.39 $\pm$ 0.76 a   |
| Aspartic acid (Asp) | Body   | 7.49 $\pm$ 0.31 a                   | 8.14 $\pm$ 0.53 a    | 7.35 $\pm$ 0.40 a    | 7.52 $\pm$ 0.57 a    |
|                     | Feces  | 2.81 $\pm$ 0.20 a                   | 2.61 $\pm$ 0.16 a    | 3.44 $\pm$ 0.17 a    | 4.23 $\pm$ 0.32 a    |
| Asparagine (Asn)    | Body   | 60.93 $\pm$ 4.12 a                  | 70.83 $\pm$ 5.73 a   | 66.14 $\pm$ 3.31 a   | 68.41 $\pm$ 4.15 a   |
|                     | Feces  | 25.33 $\pm$ 1.10 b                  | 24.52 $\pm$ 0.57 b   | 41.70 $\pm$ 2.13 a   | 38.54 $\pm$ 1.98 a   |
| Cysteine (Cys)      | Body   | 11.12 $\pm$ 0.51 A                  | 13.12 $\pm$ 0.84 A   | 3.21 $\pm$ 0.21 B    | 2.67 $\pm$ 0.14 B    |
|                     | Feces  | 0.25 $\pm$ 0.02 B                   | 0.33 $\pm$ 0.03 B    | 2.34 $\pm$ 0.14 A    | 3.15 $\pm$ 0.13 A    |
| Glutamate (Glu)     | Body   | 11.28 $\pm$ 0.88 a                  | 11.98 $\pm$ 1.05 a   | 10.04 $\pm$ 0.94 a   | 10.76 $\pm$ 0.67 a   |
|                     | Feces  | 3.15 $\pm$ 0.24 a                   | 2.96 $\pm$ 0.22 a    | 4.12 $\pm$ 0.35 a    | 4.76 $\pm$ 0.26 a    |
| Glutamine (Gln)     | Body   | 100.52 $\pm$ 8.36 a                 | 98.41 $\pm$ 7.33 a   | 90.57 $\pm$ 8.21 a   | 97.53 $\pm$ 7.66 a   |
|                     | Feces  | 28.71 $\pm$ 1.24 a                  | 26.44 $\pm$ 2.12 a   | 35.72 $\pm$ 3.56 a   | 40.33 $\pm$ 3.12 a   |
| Glycine (Gly)       | Body   | 73.69 $\pm$ 6.24 a                  | 76.52 $\pm$ 3.32 a   | 71.10 $\pm$ 5.85 a   | 78.35 $\pm$ 6.43 a   |
|                     | Feces  | 53.33 $\pm$ 3.51 a                  | 83.09 $\pm$ 6.57 a   | 92.55 $\pm$ 5.33 a   | 115.72 $\pm$ 8.41 a  |
| Histidine (His)     | Body   | 20.88 $\pm$ 1.24 a                  | 20.02 $\pm$ 1.11 a   | 10.70 $\pm$ 0.52 b   | 11.17 $\pm$ 0.47 b   |
|                     | Feces  | 4.69 $\pm$ 0.20 b                   | 4.06 $\pm$ 0.28 b    | 8.84 $\pm$ 0.41 a    | 7.87 $\pm$ 0.52 a    |
| Isoleucine (Ile)    | Body   | 41.49 $\pm$ 2.22 a                  | 42.16 $\pm$ 3.04 a   | 26.77 $\pm$ 1.29 b   | 28.13 $\pm$ 1.38 b   |
|                     | Feces  | 15.41 $\pm$ 0.84 b                  | 12.68 $\pm$ 0.61 b   | 27.22 $\pm$ 1.15 a   | 29.39 $\pm$ 1.74 a   |
| Leucine (Leu)       | Body   | 58.48 $\pm$ 2.41 a                  | 58.76 $\pm$ 1.98 a   | 32.45 $\pm$ 2.07 b   | 34.68 $\pm$ 2.15 b   |
|                     | Feces  | 20.31 $\pm$ 1.06 b                  | 19.75 $\pm$ 1.19 b   | 37.55 $\pm$ 1.24 a   | 33.17 $\pm$ 2.03 a   |
| Lysine (Lys)        | Body   | 62.09 $\pm$ 3.31 a                  | 61.05 $\pm$ 3.54 a   | 57.71 $\pm$ 4.41 a   | 52.33 $\pm$ 3.96 a   |
|                     | Feces  | 8.30 $\pm$ 0.64 a                   | 11.01 $\pm$ 0.59 a   | 13.00 $\pm$ 0.81 a   | 10.11 $\pm$ 0.90 a   |
| Methionine (Met)    | Body   | 1.74 $\pm$ 0.38 a                   | 4.26 $\pm$ 0.25 a    | 0.64 $\pm$ 0.04 b    | 0.13 $\pm$ 0.01 b    |
|                     | Feces  | 0.02 $\pm$ 0.00 b                   | 0.03 $\pm$ 0.00 b    | 0.31 $\pm$ 0.02 a    | 0.25 $\pm$ 0.02 a    |
| Phenylalanine (Phe) | Body   | 27.55 $\pm$ 1.07 a                  | 28.64 $\pm$ 1.13 a   | 19.20 $\pm$ 1.23 b   | 15.73 $\pm$ 1.19 b   |
|                     | Feces  | 11.56 $\pm$ 0.81 b                  | 9.62 $\pm$ 0.57 b    | 23.69 $\pm$ 1.04 a   | 18.96 $\pm$ 1.07 a   |
| Proline (Pro)       | Body   | 51.07 $\pm$ 3.32 a                  | 50.59 $\pm$ 4.81 a   | 59.13 $\pm$ 5.57 a   | 56.36 $\pm$ 2.97 a   |
|                     | Feces  | 21.83 $\pm$ 1.54 a                  | 24.16 $\pm$ 1.47 a   | 32.77 $\pm$ 2.05 a   | 40.54 $\pm$ 3.22 a   |
| Serine (Ser)        | Body   | 55.50 $\pm$ 2.11 a                  | 55.86 $\pm$ 4.08 a   | 41.88 $\pm$ 2.58 b   | 34.26 $\pm$ 2.14 b   |
|                     | Feces  | 13.27 $\pm$ 1.01 b                  | 11.67 $\pm$ 0.72 b   | 31.84 $\pm$ 1.22 a   | 29.62 $\pm$ 1.57 a   |
| Threonine (Thr)     | Body   | 37.91 $\pm$ 3.84 a                  | 38.90 $\pm$ 2.26 a   | 34.98 $\pm$ 3.11 a   | 37.65 $\pm$ 1.89 a   |
|                     | Feces  | 24.55 $\pm$ 1.86 a                  | 22.88 $\pm$ 1.64 a   | 27.49 $\pm$ 2.27 a   | 30.51 $\pm$ 2.72 a   |
| Tyrosine (Tyr)      | Body   | 26.02 $\pm$ 1.47 a                  | 24.73 $\pm$ 1.61 a   | 23.45 $\pm$ 2.12 a   | 24.45 $\pm$ 2.00 a   |
|                     | Feces  | 7.71 $\pm$ 0.59 a                   | 6.90 $\pm$ 0.47 a    | 8.93 $\pm$ 0.88 a    | 12.31 $\pm$ 0.75 a   |
| Valine (Val)        | Body   | 67.76 $\pm$ 6.44 a                  | 68.30 $\pm$ 6.13 a   | 60.67 $\pm$ 3.97 a   | 54.26 $\pm$ 4.01 a   |
|                     | Feces  | 15.42 $\pm$ 1.09 a                  | 18.99 $\pm$ 1.45 a   | 24.01 $\pm$ 1.88 a   | 26.49 $\pm$ 2.09 a   |
| Total               | Body   | 814.74 $\pm$ 46.77 a                | 831.04 $\pm$ 53.23 a | 714.51 $\pm$ 37.49 a | 716.21 $\pm$ 38.91 a |
|                     | Feces  | 295.08 $\pm$ 19.44 a                | 317.10 $\pm$ 20.33 a | 458.24 $\pm$ 34.17 a | 498.68 $\pm$ 24.53 a |

Free amino acid contents are analyzed with a Beckman 6300 Amino Acid Analyzer. Difference of the content of each amino acid among treatments is analyzed by ANOVA followed by the Tukey-Kramer test. Data that do not share the same lowercase or uppercase letter are significantly different at P values of 0.05 or 0.01.
